# Supplementary material for: Inter-embryo gene expression variability recapitulates the hourglass pattern of evo-devo
Source: PubMed Central journal article supplement (PMC7502200; doi:10.1186/s12915-020-00842-z), 2020-09-19
Supplement: 12915_2020_842_MOESM1_ESM.pdf [file 12915_2020_842_MOESM1_ESM.pdf]

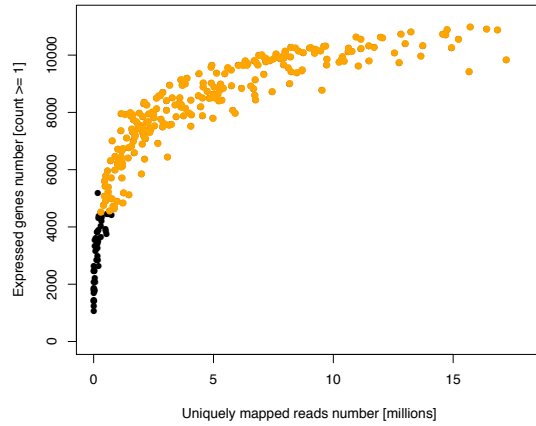

1

2 **Figure S1: Relationship between uniquely mapped reads and expressed genes**

3 Each dot represents one sample. The black dots indicate low quality samples with <4500  
 4 expressed genes or with <0.3 million uniquely mapped reads. The 239 orange colored samples  
 5 were retained for downstream analysis ("high quality samples").

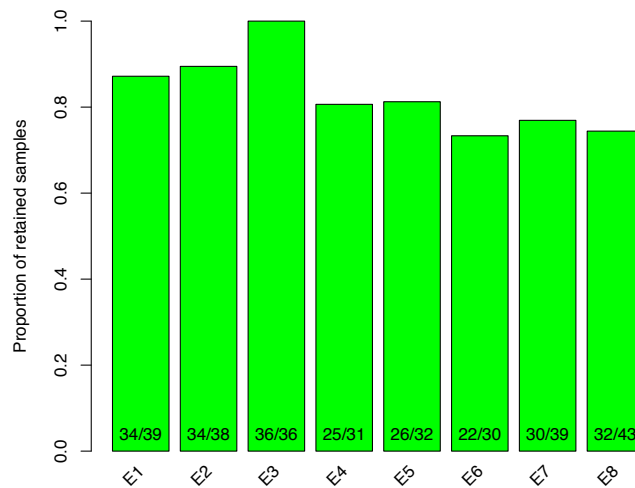

6

7 **Figure S2: Proportion of retained samples in each development stage**

8 The number of retained samples and of total samples in each stage is indicated in the bottom  
 9 of each bar.

10

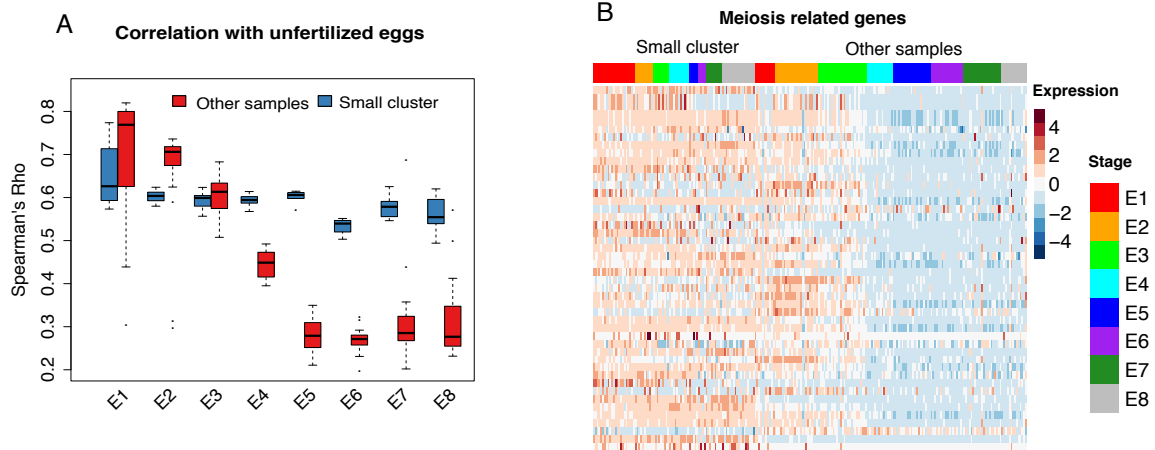

11

12 **Figure S3: Evidence that the samples from the small cluster are unfertilized eggs**

13 A. Boxplot of Spearman's correlation coefficients ( $\rho$ ) of expression between individual  
 14 unfertilized eggs and each sample from the small cluster or from the large cluster, showing  
 15 that the small cluster has an expression profile of unfertilized eggs. The lower and upper  
 16 intervals indicated by the dashed lines ("whiskers") represent 1.5 times the interquartile  
 17 range (IQR), and the box shows the lower and upper intervals of IQR together with the  
 18 median.

19 B. Expression heat map of meiosis related genes across all samples, showing that their  
 20 expression decreases over development for the large cluster, but is high in all samples of  
 21 the small cluster, consistent with unfertilized eggs.

22 For testing of an alternative explanation of the two clusters as being males and females, see  
 23 Figure S14.

24

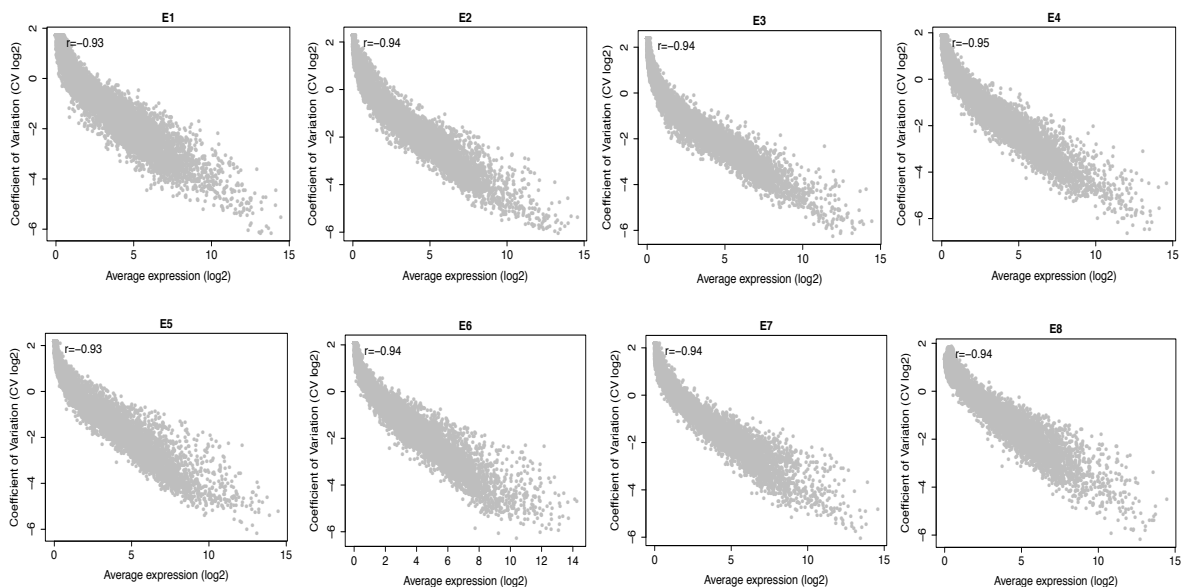

25

26 **Figure S4: Relationship between average expression and coefficient of variation at each**  
27 **stage**

28 Pearson's correlation between average expression and coefficient of variation in each  
29 development stage is indicated in the top left of each subfigure.

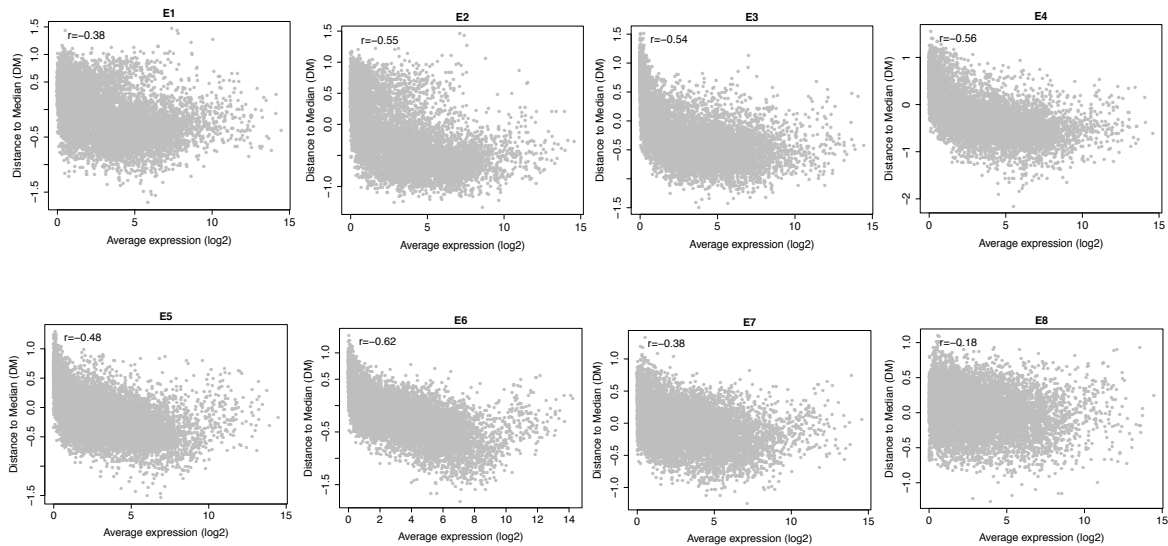

30  
31 **Figure S5: Relationship between average expression and distance to median at each stage**  
32 Pearson's correlation between average expression and distance to median in each development  
33 stage is indicated in the top left of each subfigure.

34

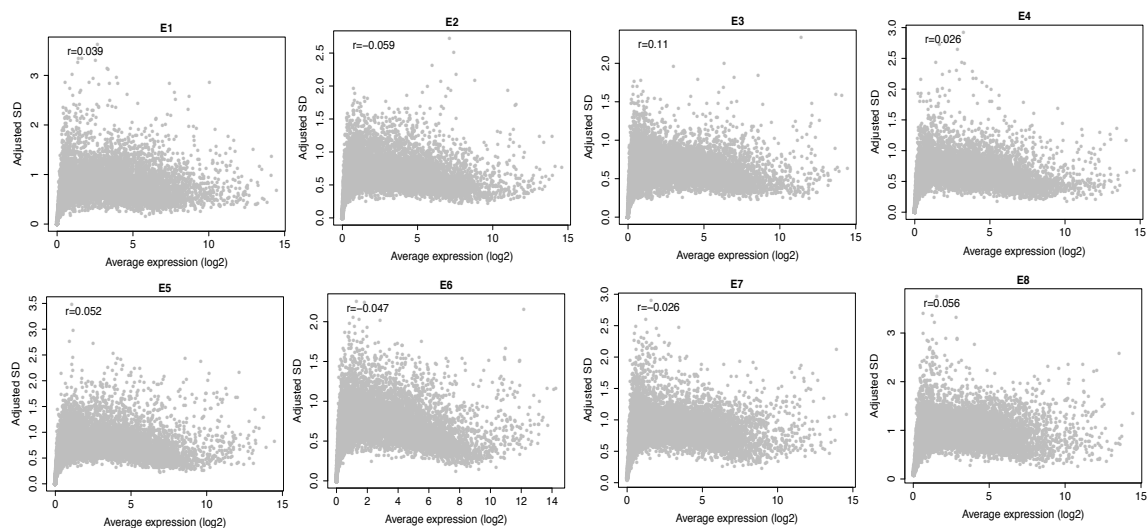

35  
36 **Figure S6: Relationship between average expression and adjusted SD at each stage**

37 Pearson's correlation between average expression and adjusted SD in each development stage  
38 is indicated in the top left of each subfigure.

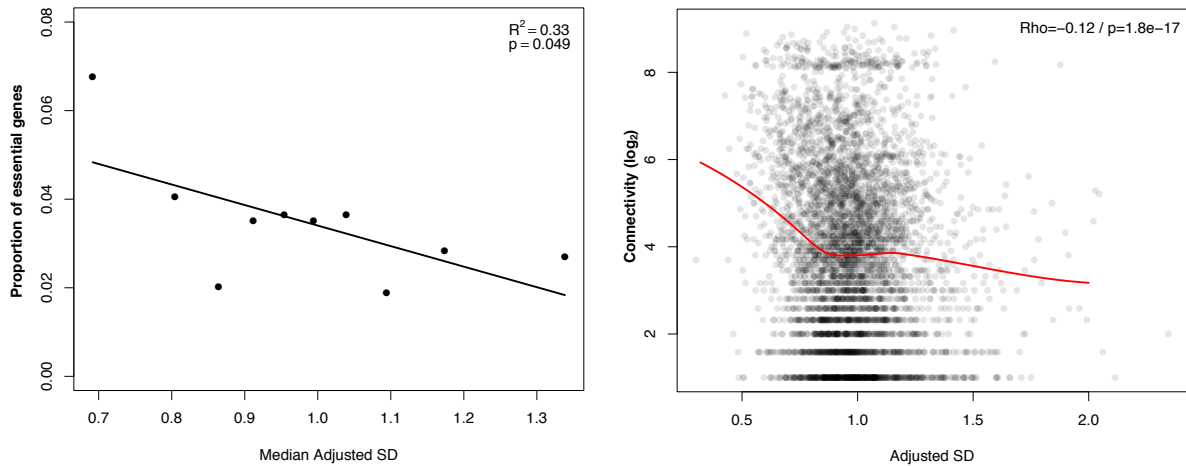

39

40 **Figure S7: Relationship between expression variability and protein importance**

41 We used the average variability across all development stages.

42 A. We split genes into 10 equally sized bins based on expression variability. The proportion  
 43 of essential genes was fit by regression (the first degree of polynomial), whose  $R^2$  and  $p$ -  
 44 value are indicated in the top-left corner of each graph. The median expression variability  
 45 of each bin was plotted on the x-axis.

46 B. Spearman's correlation between connectivity in a protein-protein interaction network and  
 47 expression variability. The coefficient and  $p$ -value are indicated in the top-right. Loess  
 48 regression lines are plotted in red.

49

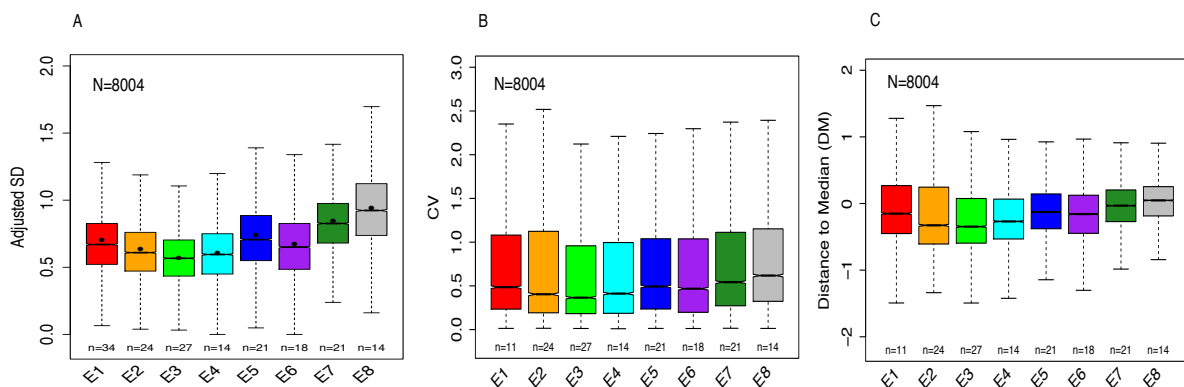

50

51 **Figure S8: Variation of expression variability across development using alternate**  
 52 **measures of variability**

53 A. Variability measured by adjusted SD; unlike in Figure 2, the variability in E1 was  
 54 calculated using all samples from both small and large clusters.

55 B. Variability measured by coefficient of variation (CV).

56 C. Variability measured by distance to median (DM).

57 The legend is the same as for Figure 2. We performed pairwise Wilcoxon test between any  
58 two stages to test the significance. The multiple test corrected  $p$ -values (Benjamini–Hochberg  
59 method) are shown in Additional file 2: Tables S6, S7 and S8.

60

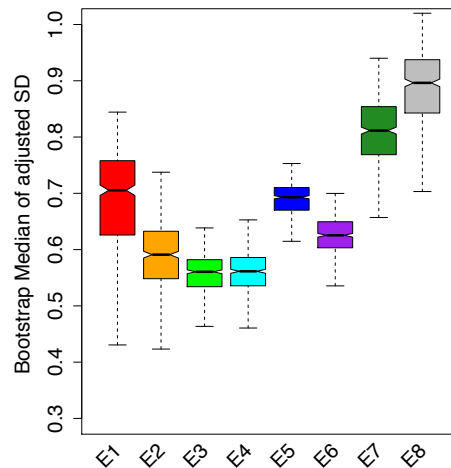

61

62 **Figure S9: Bootstrap analysis of the variability calculation**

63 We performed pairwise Wilcoxon test between any two stages to test the significance. The  
64 multiple test corrected  $p$ -values (Benjamini–Hochberg method) are shown in Additional file  
65 2: Table S9.

66

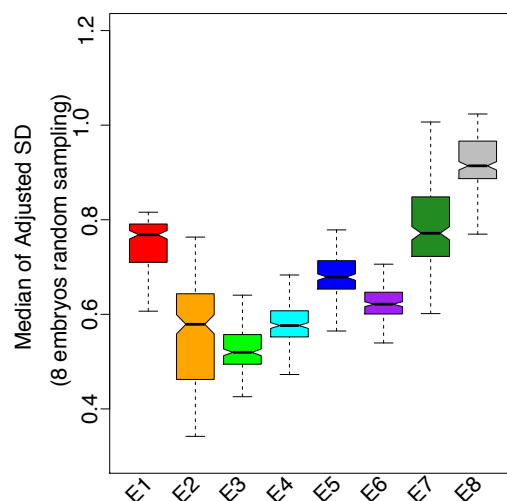

67

68 **Figure S10: Random sampling analysis of expression variability**

69 Distribution of the median adjusted SD over all genes, for 500 random resampling of 8 samples per  
70 time point. We performed pairwise Wilcoxon test between any two stages to test the significance. The  
71 multiple test corrected p-values (Benjamini–Hochberg method) are shown in Additional file 2: Table  
72 S10.  
73

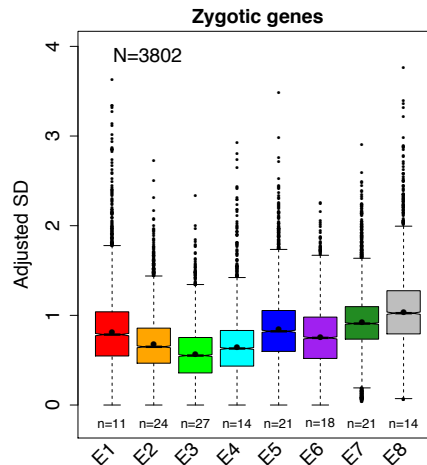

74  
75 **Figure S11: Expression variability pattern for genes without maternally expressed**  
76 **genes**  
77 The number of individual samples used in each development stage is indicated below each  
78 box. The number of genes analyzed is indicated in the top-left corner of each plot. The black  
79 dot in each box indicates the mean. The multiple test corrected p-values (Benjamini–Hochberg  
80 method) are shown in Additional file 2: Table S11.

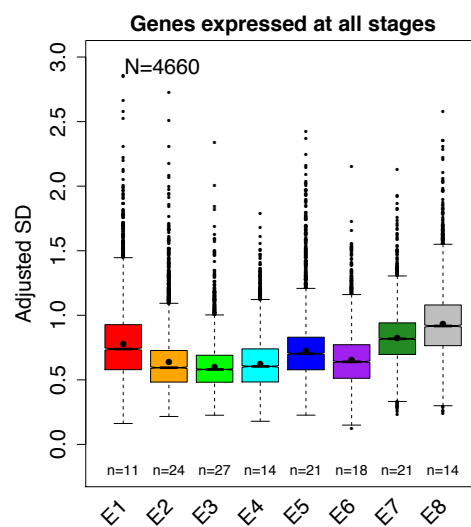

81  
82 **Figure S12: Expression variability pattern for genes expressed at all stages**

83 The number of individual samples used in each development stage is indicated below each  
 84 box. The number of genes analyzed is indicated in the top-left corner of each plot. The black  
 85 dot in each box indicates the mean. The multiple test corrected p-values (Benjamini–Hochberg  
 86 method) are shown in Additional file 2: Table S12.

87  
 88  
 89

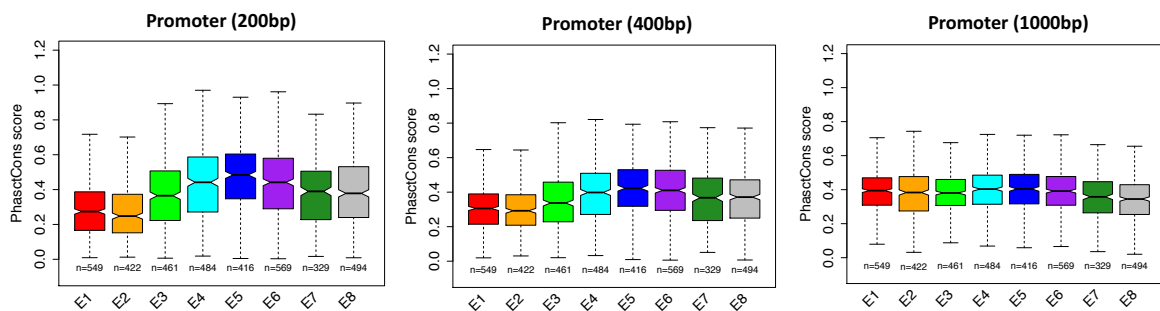

90

91 **Figure S13: Promoter sequence conservation across embryogenesis for different**  
 92 **definitions of promoter width**

93 The figure legend is the same as in Figure 3A.

94 200bp promoter: 100 bp upstream transcription TSS to 100 bp downstream of the TSS.

95 400 bp promoter: 200 bp upstream transcription TSS to 200 bp downstream of the TSS.

96 1000 bp promoter: 500 bp upstream transcription TSS to 500 bp downstream of the TSS.

97

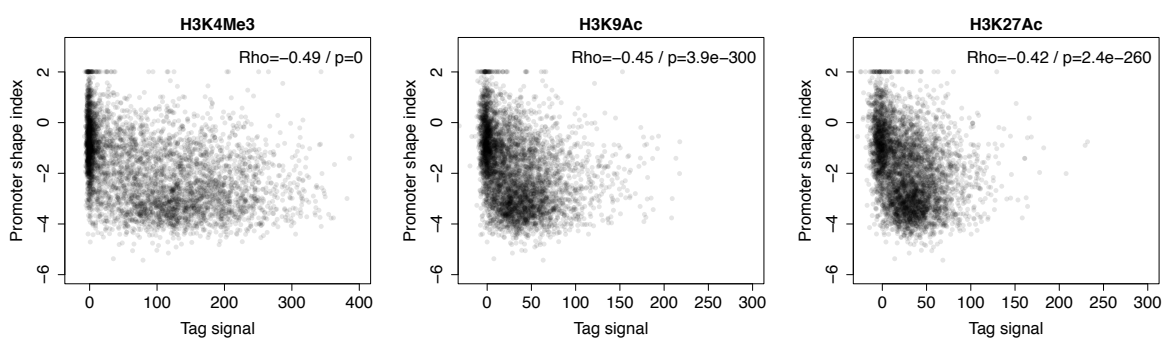

98

99

100 **Figure S14: Relationship between promoter shape index and histone modification signal**

101 Spearman's correlation between promoter shape index and histone modification signal. We  
 102 used the average signal across all development stages. The coefficient and p-value are  
 103 indicated in the top-right.

104

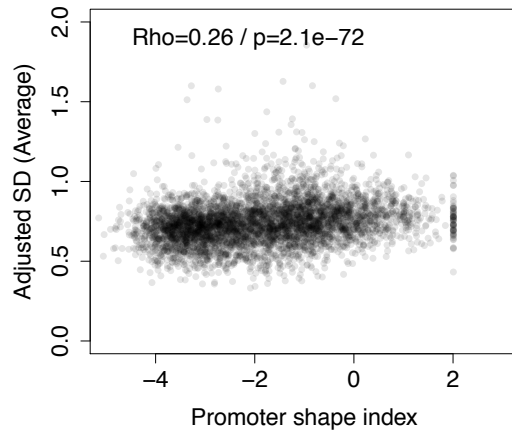

105  
106  
107  
108  
109  
110

**Figure S15: Relationship between promoter shape index and expression variability**  
Spearman's correlation between promoter shape index and expression variability. Lower promoter shape index means broader promoter. We used the average variability across all development stages. The coefficient and  $p$ -value are indicated in the top-left.

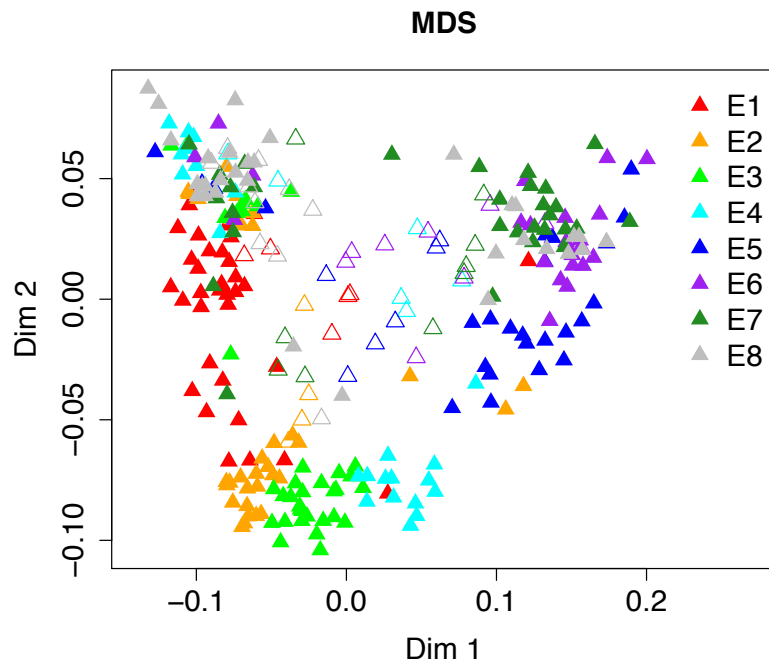

111  
112  
113  
114  
115

**Figure S16: Multidimensional scaling analysis for all samples**  
Different colors indicate different stages. The solid triangles represent high quality samples according to Figure S1; the hollow triangles represent low quality samples which were discarded.



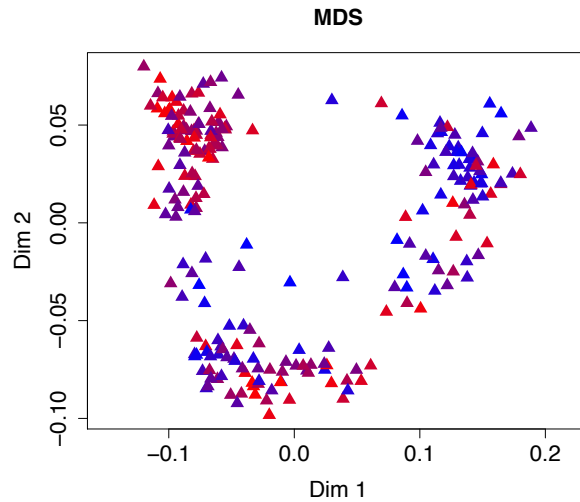

116

117 **Figure S17: Mapping of X/autosome gene expression ratios to the multidimensional**  
 118 **scaling analysis plot**

119 We calculated the ratio of mean expression between genes from the X chromosome and from  
 120 the autosomes for each sample. Red represents high ratio, blue represents low ratio. For  
 121 *Drosophila*, dosage compensation is achieved by increasing expression of X chromosome  
 122 genes in males. Since the dosage compensation is still incomplete during development,  
 123 females should have a higher ratio of mean expression between genes from the X chromosome  
 124 and from the autosomes. Here, we found both high ratio samples and low ratio samples are  
 125 well mixed in both the cluster and large clusters. Thus, we reject the hypothesis that the two  
 126 different clusters are due to sex.

127

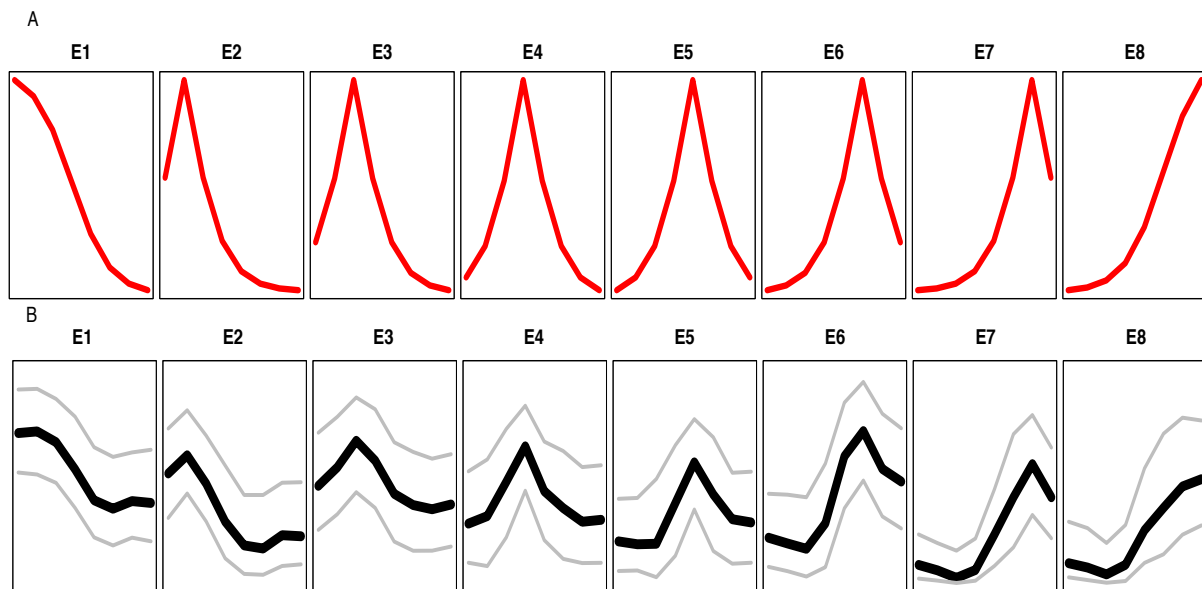

128

129 **Figure S18: Detection of stage specific genes**

130 A. The artificial expression profile.

131 The expression of identified stage specific genes. The bold black line represents the median

132 expression, the two gray lines represent 25th and 75th quantiles of expression, respectively.
