# Supplementary material for: Inter-embryo gene expression variability recapitulates the hourglass pattern of evo-devo
Source: PubMed Central journal article supplement (PMC7502200; doi:10.1186/s12915-020-00842-z), 2020-09-19
Supplement: 12915_2020_842_MOESM2_ESM.pdf [file 12915_2020_842_MOESM2_ESM.pdf]

1 **Table S1: variability (adjusted SD) comparison between any two stages**

2 Wilcoxon test, multiple test corrected *p*-values (Benjamini–Hochberg method).

| Stages | E1        | E2        | E3        | E4        | E5        | E6       | E7        |
|--------|-----------|-----------|-----------|-----------|-----------|----------|-----------|
| E2     | 3.11e-180 |           |           |           |           |          |           |
| E3     | 0.00e+00  | 6.17e-43  |           |           |           |          |           |
| E4     | 1.21e-247 | 5.24e-08  | 2.49e-16  |           |           |          |           |
| E5     | 1.06e-13  | 2.57e-118 | 4.14e-292 | 1.99e-175 |           |          |           |
| E6     | 1.93e-92  | 3.99e-17  | 2.62e-105 | 8.75e-43  | 1.14e-44  |          |           |
| E7     | 2.57e-78  | 0.00e+00  | 0.00e+00  | 0.00e+00  | 3.06e-181 | 0.00e+00 |           |
| E8     | 6.64e-268 | 0.00e+00  | 0.00e+00  | 0.00e+00  | 0.00e+00  | 0.00e+00 | 3.14e-106 |

3

4 **Table S2: promoter sequence conservation comparison between any two stages**

5 Wilcoxon test, multiple test corrected *p*-values (Benjamini–Hochberg method).

| Stages | E1       | E2       | E3       | E4       | E5       | E6       | E7       |
|--------|----------|----------|----------|----------|----------|----------|----------|
| E2     | 5.02e-01 |          |          |          |          |          |          |
| E3     | 1.70e-11 | 4.66e-12 |          |          |          |          |          |
| E4     | 5.57e-29 | 1.96e-28 | 4.06e-06 |          |          |          |          |
| E5     | 1.07e-35 | 7.75e-35 | 2.93e-10 | 8.85e-02 |          |          |          |
| E6     | 2.18e-37 | 3.23e-36 | 5.29e-09 | 4.19e-01 | 3.13e-01 |          |          |
| E7     | 1.89e-11 | 5.11e-12 | 7.91e-01 | 2.09e-05 | 2.13e-09 | 8.87e-08 |          |
| E8     | 2.28e-21 | 1.72e-21 | 2.18e-02 | 9.67e-03 | 7.81e-06 | 1.79e-04 | 6.34e-02 |

6

7 **Table S3: proximal promoter H3K4Me3 signal (Z score) comparison between any two**  
8 **stages**

9 Wilcoxon test, multiple test corrected *p*-values (Benjamini–Hochberg method).

| Satges | 0-4h     | 4-8h      | 8-12h     | 12-16h    | 16-20h    |
|--------|----------|-----------|-----------|-----------|-----------|
| 4-8h   | 2.39e-36 |           |           |           |           |
| 8-12h  | 3.71e-93 | 5.51e-13  |           |           |           |
| 12-16h | 6.35e-35 | 6.84e-01  | 1.28e-17  |           |           |
| 16-20h | 2.29e-09 | 6.05e-08  | 4.17e-47  | 7.73e-11  |           |
| 20-24h | 3.10e-88 | 2.08e-118 | 8.88e-197 | 1.40e-161 | 9.07e-182 |

10

11

12

13 **Table S4: proximal promoter H3K9Ac signal (Z score) comparison between any two**  
 14 **stages**

15 Wilcoxon test, multiple test corrected *p*-values (Benjamini–Hochberg method).

| Satges | 0-4h      | 4-8h      | 8-12h     | 12-16h    | 16-20h   |
|--------|-----------|-----------|-----------|-----------|----------|
| 4-8h   | 1.73e-06  |           |           |           |          |
| 8-12h  | 2.17e-40  | 3.75e-16  |           |           |          |
| 12-16h | 9.49e-01  | 1.71e-07  | 2.17e-40  |           |          |
| 16-20h | 4.50e-78  | 2.03e-97  | 1.23e-171 | 1.41e-67  |          |
| 20-24h | 7.31e-145 | 3.75e-148 | 1.11e-230 | 8.16e-121 | 1.13e-28 |

16

17 **Table S5: proximal promoter H3K27Ac signal (Z score) comparison between any two**  
 18 **stages**

19 Wilcoxon test, multiple test corrected *p*-values (Benjamini–Hochberg method).

| Satges | 0-4h      | 4-8h     | 8-12h     | 12-16h   | 16-20h    |
|--------|-----------|----------|-----------|----------|-----------|
| 4-8h   | 2.45e-03  |          |           |          |           |
| 8-12h  | 7.91e-141 | 2.12e-88 |           |          |           |
| 12-16h | 6.90e-01  | 1.85e-04 | 4.74e-127 |          |           |
| 16-20h | 8.98e-01  | 3.97e-03 | 6.20e-147 | 6.87e-01 |           |
| 20-24h | 2.97e-103 | 8.33e-85 | 6.08e-292 | 1.31e-57 | 1.89e-165 |

20

21 **Table S6: variability (adjusted SD) comparison between any two stages**

22 Here, the E1 stage also contains samples from the small clusters. Wilcoxon test, multiple test  
 23 corrected *p*-values (Benjamini–Hochberg method).

| Stages | E1        | E2        | E3        | E4        | E5        | E6       | E7        |
|--------|-----------|-----------|-----------|-----------|-----------|----------|-----------|
| E2     | 5.49e-58  |           |           |           |           |          |           |
| E3     | 6.24e-202 | 2.55e-46  |           |           |           |          |           |
| E4     | 1.02e-96  | 1.57e-07  | 1.60e-18  |           |           |          |           |
| E5     | 9.25e-19  | 1.32e-124 | 3.41e-303 | 6.09e-175 |           |          |           |
| E6     | 2.56e-09  | 3.21e-19  | 6.02e-112 | 2.66e-43  | 1.86e-43  |          |           |
| E7     | 0.00e+00  | 0.00e+00  | 0.00e+00  | 0.00e+00  | 1.56e-163 | 0.00e+00 |           |
| E8     | 0.00e+00  | 0.00e+00  | 0.00e+00  | 0.00e+00  | 0.00e+00  | 0.00e+00 | 6.72e-104 |

24

25

26

27

28

29

30 **Table S7: variability (coefficient of variation) comparison between any two stages**31 Wilcoxon test, multiple test corrected *p*-values (Benjamini–Hochberg method).

| Stages | E1       | E2       | E3        | E4       | E5       | E6       | E7       |
|--------|----------|----------|-----------|----------|----------|----------|----------|
| E2     | 9.30e-9  |          |           |          |          |          |          |
| E3     | 1.35e-25 | 5.29e-05 |           |          |          |          |          |
| E4     | 1.24e-15 | 3.32e-02 | 4.33e-02  |          |          |          |          |
| E5     | 6.79e-01 | 3.64e-08 | 1.22e-24  | 9.45e-15 |          |          |          |
| E6     | 1.70e-05 | 1.94e-01 | 1.69e-08  | 3.31e-04 | 9.93e-05 |          |          |
| E7     | 1.87e-08 | 9.49e-30 | 3.66e-60  | 9.84e-43 | 1.76e-09 | 2.14e-22 |          |
| E8     | 3.55e-28 | 3.96e-59 | 3.97e-103 | 1.39e-78 | 1.11e-31 | 1.91e-50 | 1.40e-08 |

32

33 **Table S8: variability (distance to median) comparison between any two stages**34 Wilcoxon test, multiple test corrected *p*-values (Benjamini–Hochberg method).

| Stages | E1       | E2        | E3        | E4        | E5        | E6        | E7       |
|--------|----------|-----------|-----------|-----------|-----------|-----------|----------|
| E2     | 5.64e-51 |           |           |           |           |           |          |
| E3     | 4.83e-94 | 3.00e-04  |           |           |           |           |          |
| E4     | 3.57e-54 | 1.13e-01  | 3.90e-10  |           |           |           |          |
| E5     | 9.54e-01 | 2.03e-61  | 1.09e-119 | 4.91e-70  |           |           |          |
| E6     | 1.58e-11 | 1.82e-18  | 9.34e-52  | 3.13e-24  | 2.71e-11  |           |          |
| E7     | 2.41e-30 | 1.35e-154 | 5.48e-265 | 5.28e-203 | 3.12e-44  | 5.15e-87  |          |
| E8     | 9.09e-98 | 1.10e-251 | 0.00e+00  | 0.00e+00  | 9.77e-148 | 2.36e-210 | 1.22e-37 |

35

36 **Table S9: bootstrapped median variability comparison between any two stages**37 Wilcoxon test, multiple test corrected *p*-values (Benjamini–Hochberg method).

| Stages | E1        | E2        | E3        | E4        | E5        | E6        | E7       |
|--------|-----------|-----------|-----------|-----------|-----------|-----------|----------|
| E2     | 1.60e-66  |           |           |           |           |           |          |
| E3     | 7.73e-99  | 3.94e-22  |           |           |           |           |          |
| E4     | 2.26e-96  | 1.38e-18  | 2.41e-18  |           |           |           |          |
| E5     | 1.14e-02  | 4.67e-134 | 1.20e-303 | 4.16e-163 |           |           |          |
| E6     | 1.50e-40  | 1.33e-27  | 2.62e-112 | 1.17e-111 | 3.11e-123 |           |          |
| E7     | 4.58e-90  | 2.51e-163 | 4.15e+00  | 4.15e-164 | 2.96e-141 | 1.05e-163 |          |
| E8     | 4.15e-139 | 1.05e-163 | 4.15e+00  | 4.15e-164 | 7.64e-159 | 1.20e-163 | 2.60e-59 |

38

39

40 **Table S10: Random sampling variability comparison between any two stages**

41 Wilcoxon test, multiple test corrected *p*-values (Benjamini–Hochberg method).

| Stages | E1       | E2       | E3       | E4       | E5       | E6       | E7       |
|--------|----------|----------|----------|----------|----------|----------|----------|
| E2     | 2.58e-48 |          |          |          |          |          |          |
| E3     | 7.50e-60 | 2.06e-03 |          |          |          |          |          |
| E4     | 7.11e-53 | 4.66e-01 | 2.17e-23 |          |          |          |          |
| E5     | 5.75e-22 | 3.13e-35 | 1.17e-62 | 9.66e-57 |          |          |          |
| E6     | 5.59e-42 | 4.44e-09 | 7.67e-50 | 7.27e-27 | 2.89e-32 |          |          |
| E7     | 6.10e-04 | 4.12e-58 | 9.24e-66 | 7.37e-65 | 1.47e-34 | 8.27e-59 |          |
| E8     | 7.37e-55 | 4.30e-66 | 4.30e-66 | 4.30e-66 | 2.47e-65 | 4.30e-66 | 6.38e-38 |

42

43 **Table S11: variability (adjusted SD) comparison between any two stages (for genes**  
 44 **without maternally expressed genes)**

45 Wilcoxon test, multiple test corrected *p*-values (Benjamini–Hochberg method).

| Stages | E1        | E2        | E3        | E4        | E5        | E6        | E7       |
|--------|-----------|-----------|-----------|-----------|-----------|-----------|----------|
| E2     | 3.25e-51  |           |           |           |           |           |          |
| E3     | 4.81e-175 | 2.21e-53  |           |           |           |           |          |
| E4     | 2.46e-78  | 3.42e-05  | 2.09e-27  |           |           |           |          |
| E5     | 1.14e-05  | 4.81e-92  | 1.01e-247 | 3.48e-127 |           |           |          |
| E6     | 8.65e-07  | 1.11e-26  | 5.08e-135 | 5.46e-48  | 3.46e-22  |           |          |
| E7     | 2.31e-51  | 2.49e-227 | 0.00e+00  | 5.31e-280 | 3.03e-28  | 4.10e-98  |          |
| E8     | 1.78e-140 | 0.00e+00  | 0.00e+00  | 0.00e+00  | 2.35e-109 | 6.47e-212 | 7.64e-45 |

46

47 **Table S12: variability (adjusted SD) comparison between any two stages (for genes**  
 48 **expressed at all stages)**

49 Wilcoxon test, multiple test corrected *p*-values (Benjamini–Hochberg method).

| Stages | E1        | E2        | E3        | E4        | E5        | E6       | E7        |
|--------|-----------|-----------|-----------|-----------|-----------|----------|-----------|
| E2     | 3.57e-175 |           |           |           |           |          |           |
| E3     | 3.05e-254 | 2.92e-06  |           |           |           |          |           |
| E4     | 6.57e-170 | 2.39e-01  | 7.21e-10  |           |           |          |           |
| E5     | 2.05e-17  | 3.71e-125 | 1.92e-200 | 7.95e-113 |           |          |           |
| E6     | 9.89e-105 | 1.45e-17  | 2.93e-45  | 2.38e-13  | 2.87e-52  |          |           |
| E7     | 9.01e-47  | 0.00e+00  | 0.00e+00  | 0.00e+00  | 1.97e-163 | 0.00e+00 |           |
| E8     | 3.11e-199 | 0.00e+00  | 0.00e+00  | 0.00e+00  | 0.00e+00  | 0.00e+00 | 2.19e-107 |

50

51 **Table S13: RNA-seq library information**

|              | Library E1_1        |                |
|--------------|---------------------|----------------|
| stage        | position in 96-well | sample barcode |
| embryo2-3h   | A2                  | AAATCA         |
| embryo2-3h   | B12                 | GTAAAA         |
| embryo2-3h   | C6                  | TATAAG         |
| embryo2-3h   | D12                 | GAAGAC         |
| embryo2-3h   | D2                  | TTACTA         |
| embryo2-3h   | D4                  | TTCATA         |
| embryo5-6h   | B10                 | GAATAT         |
| embryo5-6h   | B7                  | CATAAA         |
| embryo5-6h   | C10                 | TCTAAT         |
| embryo5-6h   | D10                 | CATCAG         |
| embryo5-6h   | D9                  | ATCGAG         |
| embryo8-9h   | A12                 | ATAGAT         |
| embryo8-9h   | A3                  | AACATA         |
| embryo8-9h   | B8                  | CTAAAA         |
| embryo8-9h   | B9                  | CTTAAT         |
| embryo8-9h   | C11                 | TGAATA         |
| embryo8-9h   | C3                  | TAATAG         |
| embryo8-9h   | C4                  | TACAAA         |
| embryo8-9h   | C5                  | TAGAAT         |
| embryo8-9h   | C8                  | TATTAC         |
| embryo8-9h   | D5                  | TTGTTA         |
| embryo8-9h   | D7                  | TTTTAG         |
| embryo11-12h | A1                  | AAACAT         |
| embryo11-12h | A11                 | ATAAGT         |
| embryo11-12h | A4                  | AAGTTA         |
| embryo11-12h | A5                  | AATATG         |
| embryo11-12h | A6                  | AATGTA         |
| embryo11-12h | A7                  | AATTTT         |
| embryo11-12h | B5                  | ATTGTT         |
| embryo11-12h | C7                  | TATCAT         |
| embryo11-12h | C9                  | TCAAAA         |
| embryo11-12h | D1                  | TTAACT         |
| embryo11-12h | D6                  | TTTATG         |
| embryo14-15h | A8                  | ACTAAA         |
| embryo14-15h | A9                  | AGAATT         |
| embryo14-15h | B1                  | ATATGA         |
| embryo14-15h | B11                 | GATTAA         |
| embryo14-15h | B4                  | ATTATC         |
| embryo14-15h | C12                 | TGTATT         |
| embryo14-15h | D11                 | CGACTT         |

|              |     |         |
|--------------|-----|---------|
| embryo14-15h | D8  | TTGGAT  |
| embryo17-18h | B2  | ATCTAT  |
| embryo17-18h | B6  | ATTTTG  |
| embryo17-18h | C1  | TAA AAC |
| embryo17-18h | C2  | TAACAA  |
| embryo20-21h | A10 | AGTATA  |
| embryo20-21h | D3  | TTATCA  |
| embryo23-24h | B3  | ATGTAA  |

52

| stage        | Library E1_2<br>position in 96-well | sample barcode |
|--------------|-------------------------------------|----------------|
| embryo2-3h   | E10                                 | CACCGG         |
| embryo2-3h   | F2                                  | CCCGAG         |
| embryo2-3h   | F3                                  | CCGCAG         |
| embryo2-3h   | F7                                  | CGCAGG         |
| embryo2-3h   | G10                                 | GCGCCA         |
| embryo2-3h   | H11                                 | TGCGCG         |
| embryo2-3h   | H5                                  | GGGCGA         |
| embryo2-3h   | H8                                  | GTCGCG         |
| embryo5-6h   | E2                                  | GTCAAG         |
| embryo5-6h   | E6                                  | ACCCGG         |
| embryo5-6h   | G11                                 | GCGGCT         |
| embryo5-6h   | H7                                  | GGTCCC         |
| embryo8-9h   | E1                                  | GGACAT         |
| embryo8-9h   | E9                                  | AGGCGG         |
| embryo8-9h   | F8                                  | CGCCTC         |
| embryo8-9h   | G5                                  | GAGGGC         |
| embryo8-9h   | G7                                  | GCCCCT         |
| embryo8-9h   | H10                                 | TCGCGG         |
| embryo8-9h   | H12                                 | TGGGCC         |
| embryo8-9h   | H4                                  | GGGACC         |
| embryo8-9h   | H9                                  | GTGGGG         |
| embryo11-12h | E5                                  | CTCTCC         |
| embryo11-12h | E8                                  | AGCCGC         |
| embryo11-12h | F6                                  | CGACGG         |
| embryo14-15h | E12                                 | CCACGC         |
| embryo14-15h | E4                                  | TTGTCC         |
| embryo14-15h | E7                                  | ACGCGC         |
| embryo14-15h | F10                                 | CGGAGC         |
| embryo14-15h | F9                                  | CGCGTG         |
| embryo14-15h | G1                                  | CGTCGC         |
| embryo14-15h | G8                                  | GCCGCA         |
| embryo17-18h | G4                                  | GACGGG         |

|              |     |        |
|--------------|-----|--------|
| embryo17-18h | G6  | GCAGGC |
| embryo17-18h | G9  | GCCTGC |
| embryo17-18h | H1  | GCTGGG |
| embryo17-18h | H3  | GGCGCT |
| embryo17-18h | H6  | GGGGGT |
| embryo20-21h | E11 | CAGCGC |
| embryo20-21h | F1  | CCCCAC |
| embryo20-21h | F11 | CGGCTG |
| embryo20-21h | F12 | CGGGTC |
| embryo20-21h | F4  | CCGGGT |
| embryo20-21h | F5  | CCTCGG |
| embryo20-21h | G12 | GCGTGG |
| embryo20-21h | H2  | GGCACG |
| embryo23-24h | E3  | TCCAAC |
| embryo23-24h | G2  | CTCCGC |
| embryo23-24h | G3  | CTGGGC |

53

| stage      | Library E2<br>position in 96-well | sample barcode |
|------------|-----------------------------------|----------------|
| embryo2-3h | B6                                | ATTTTG         |
| embryo2-3h | C12                               | TGTATT         |
| embryo2-3h | D10                               | CATCAG         |
| embryo2-3h | D2                                | TACTA          |
| embryo2-3h | D6                                | TTTATG         |
| embryo2-3h | E1                                | GGACAT         |
| embryo2-3h | E10                               | CACCGG         |
| embryo2-3h | E11                               | CAGCGC         |
| embryo2-3h | H1                                | GCTGGG         |
| embryo2-3h | H11                               | TGCGCG         |
| embryo5-6h | A11                               | ATAAGT         |
| embryo5-6h | A3                                | AACATA         |
| embryo5-6h | A4                                | AAGTTA         |
| embryo5-6h | A7                                | AATTTC         |
| embryo5-6h | A9                                | AGAATT         |
| embryo5-6h | B3                                | ATGTAA         |
| embryo5-6h | B7                                | CATAAA         |
| embryo5-6h | B8                                | CTAAAA         |
| embryo5-6h | D7                                | TTTTAG         |
| embryo5-6h | D9                                | ATCGAG         |
| embryo5-6h | E12                               | CCACGC         |
| embryo5-6h | F10                               | CGGAGC         |
| embryo5-6h | G4                                | GACGGG         |
| embryo5-6h | G9                                | GCCTGC         |

|              |     |        |
|--------------|-----|--------|
| embryo5-6h   | H7  | GGTCCC |
| embryo5-6h   | H8  | GTCGCG |
| embryo8-9h   | A10 | AGTATA |
| embryo8-9h   | A6  | AATGTA |
| embryo8-9h   | B2  | ATCTAT |
| embryo8-9h   | C10 | TCTAAT |
| embryo8-9h   | D4  | TTCATA |
| embryo8-9h   | E4  | TTGTCC |
| embryo8-9h   | E7  | ACGCGC |
| embryo8-9h   | F2  | CCCGAG |
| embryo8-9h   | G5  | GAGGGC |
| embryo8-9h   | H12 | TGGGCC |
| embryo8-9h   | H9  | GTGGGG |
| embryo11-12h | A8  | ACTAAA |
| embryo11-12h | B10 | GAATAT |
| embryo11-12h | B4  | ATTATC |
| embryo11-12h | B9  | CTTAAT |
| embryo11-12h | F11 | CGGCTG |
| embryo11-12h | F12 | CGGGTC |
| embryo11-12h | G10 | GCGCCA |
| embryo11-12h | H2  | GGCACG |
| embryo14-15h | C3  | TAATAG |
| embryo14-15h | C6  | TATAAG |
| embryo14-15h | C7  | TATCAT |
| embryo14-15h | D1  | TTAACT |
| embryo14-15h | D8  | TTGGAT |
| embryo14-15h | E9  | AGGCGG |
| embryo14-15h | G6  | GCAGGC |
| embryo14-15h | G8  | GCCGCA |
| embryo17-18h | A1  | AAACAT |
| embryo17-18h | A5  | AATATG |
| embryo17-18h | B1  | ATATGA |
| embryo17-18h | B12 | GTAAA  |
| embryo17-18h | C1  | TAAAAC |
| embryo17-18h | C8  | TATTAC |
| embryo17-18h | D5  | TTGTTA |
| embryo17-18h | E2  | GTCAAG |
| embryo17-18h | E5  | CTCTCC |
| embryo17-18h | F1  | CCCCAC |
| embryo17-18h | F6  | CGACGG |
| embryo17-18h | G2  | CTCCGC |
| embryo20-21h | A2  | AAATCA |
| embryo20-21h | C4  | TACAAA |



|              |     |        |
|--------------|-----|--------|
| embryo20-21h | E6  | ACCCGG |
| embryo20-21h | F3  | CCGCAG |
| embryo20-21h | F5  | CCTCGG |
| embryo20-21h | F8  | CGCCTC |
| embryo20-21h | G1  | CGTCGC |
| embryo20-21h | G11 | GCGGCT |
| embryo20-21h | H10 | TCGCGG |
| embryo23-24h | A12 | ATAGAT |
| embryo23-24h | B11 | GATTAA |
| embryo23-24h | B5  | ATTGTT |
| embryo23-24h | C11 | TGAATA |
| embryo23-24h | C2  | TAACAA |
| embryo23-24h | C5  | TAGAAT |
| embryo23-24h | C9  | TCAAAA |
| embryo23-24h | D11 | CGACTT |
| embryo23-24h | D12 | GAAGAC |
| embryo23-24h | D3  | TTATCA |
| embryo23-24h | E3  | TCCAAC |
| embryo23-24h | E8  | AGCCGC |
| embryo23-24h | F4  | CCGGGT |
| embryo23-24h | F7  | CGCAGG |
| embryo23-24h | F9  | CGCGTG |
| embryo23-24h | G12 | GCGTGG |
| embryo23-24h | G3  | CTGGGC |
| embryo23-24h | G7  | GCCCTT |
| embryo23-24h | H3  | GGCGCT |
| embryo23-24h | H4  | GGGACC |
| embryo23-24h | H5  | GGGCGA |
| embryo23-24h | H6  | GGGGGT |

54

| stage      | Library E3<br>position in 96-<br>well | sample<br>barcode |
|------------|---------------------------------------|-------------------|
| embryo2-3h | A10                                   | AGTATA            |
| embryo2-3h | A12                                   | ATAGAT            |
| embryo2-3h | A7                                    | AATTC             |
| embryo2-3h | A8                                    | ACTAAA            |
| embryo2-3h | B2                                    | ATCTAT            |
| embryo2-3h | C1                                    | TAAAAC            |
| embryo2-3h | C8                                    | TATTAC            |
| embryo2-3h | C9                                    | TCAAAA            |
| embryo2-3h | D3                                    | TTATCA            |
| embryo2-3h | F11                                   | CGGCTG            |

|              |     |        |
|--------------|-----|--------|
| embryo2-3h   | F4  | CCGGGT |
| embryo2-3h   | F5  | CCTCGG |
| embryo2-3h   | G12 | GCGTGG |
| embryo2-3h   | G4  | GACGGG |
| embryo2-3h   | H9  | GTGGGG |
| embryo5-6h   | A2  | AAATCA |
| embryo5-6h   | B1  | ATATGA |
| embryo5-6h   | B9  | CTTAAT |
| embryo5-6h   | D1  | TTAACT |
| embryo5-6h   | D4  | TTCATA |
| embryo5-6h   | D5  | TTGTTA |
| embryo5-6h   | D6  | TTTATG |
| embryo5-6h   | E4  | TTGTCC |
| embryo5-6h   | F12 | CGGGTC |
| embryo5-6h   | G2  | CTCCGC |
| embryo5-6h   | G3  | CTGGGC |
| embryo5-6h   | G7  | GCCCCT |
| embryo5-6h   | H10 | TCGCGG |
| embryo8-9h   | B3  | ATGTAA |
| embryo8-9h   | D7  | TTTTAG |
| embryo8-9h   | E12 | CCACGC |
| embryo8-9h   | F8  | CGCCTC |
| embryo8-9h   | H1  | GCTGGG |
| embryo11-12h | A1  | AAACAT |
| embryo11-12h | A9  | AGAATT |
| embryo11-12h | B11 | GATTAA |
| embryo11-12h | B8  | CTAAAA |
| embryo11-12h | C5  | TAGAAT |
| embryo11-12h | F1  | CCCCAC |
| embryo11-12h | F3  | CCGCAG |
| embryo11-12h | F7  | CGCAGG |
| embryo11-12h | H4  | GGGACC |
| embryo14-15h | A5  | AATATG |
| embryo14-15h | B4  | ATTATC |

|              |     |        |
|--------------|-----|--------|
| embryo14-15h | C10 | TCTAAT |
| embryo14-15h | C3  | TAATAG |
| embryo14-15h | F10 | CGGAGC |
| embryo14-15h | F2  | CCCGAG |
| embryo14-15h | G10 | GCGCCA |
| embryo14-15h | H2  | GGCACG |
| embryo14-15h | H5  | GGGCGA |
| embryo17-18h | D11 | CGACTT |
| embryo17-18h | E11 | CAGCGC |
| embryo17-18h | E3  | TCCAAC |
| embryo17-18h | E9  | AGGCGG |
| embryo17-18h | F9  | CGCGTG |
| embryo17-18h | H11 | TGCGCG |
| embryo17-18h | H12 | TGGGCC |
| embryo17-18h | H3  | GGCGCT |
| embryo20-21h | A11 | ATAAGT |
| embryo20-21h | A3  | AACATA |
| embryo20-21h | A4  | AAGTTA |
| embryo20-21h | B10 | GAATAT |
| embryo20-21h | B5  | ATTGTT |
| embryo20-21h | B6  | ATTTTG |
| embryo20-21h | B7  | CATAAA |
| embryo20-21h | C2  | TAACAA |

|              |     |        |
|--------------|-----|--------|
| embryo20-21h | C4  | TACAAA |
| embryo20-21h | D2  | TTACTA |
| embryo20-21h | D9  | ATCGAG |
| embryo20-21h | E2  | GTCAAG |
| embryo20-21h | E5  | CTCTCC |
| embryo20-21h | E6  | ACCCGG |
| embryo20-21h | E7  | ACGCGC |
| embryo20-21h | E8  | AGCCGC |
| embryo20-21h | G11 | GCGGCT |
| embryo20-21h | G6  | GCAGGC |
| embryo20-21h | G9  | GCCTGC |
| embryo20-21h | H7  | GGTCCC |
| embryo23-24h | A6  | AATGTA |
| embryo23-24h | B12 | GTTAAA |
| embryo23-24h | C11 | TGAATA |
| embryo23-24h | C12 | TGTATT |
| embryo23-24h | C6  | TATAAG |
| embryo23-24h | C7  | TATCAT |
| embryo23-24h | D10 | CATCAG |
| embryo23-24h | D12 | GAAGAC |
| embryo23-24h | D8  | TTGGAT |
| embryo23-24h | E1  | GGACAT |
| embryo23-24h | E10 | CACCGG |

|                  |    |        |
|------------------|----|--------|
| embryo23-<br>24h | F6 | CGACGG |
| embryo23-<br>24h | G1 | CGTCGC |
| embryo23-<br>24h | G5 | GAGGGC |
| embryo23-<br>24h | G8 | GCCGCA |
| embryo23-<br>24h | H6 | GGGGGT |
| embryo23-<br>24h | H8 | GTCGCG |

55  
56  
57
